# Supplementary material for: Carbonized Nickel Complex of Sodium Pectate as Catalyst for Proton-Exchange Membrane Fuel Cells
Source: MDPI journal article supplement (doi:10.3390/membranes13070635), 2023-06-30
Supplement: s1 [file s1]

# Carbonized Nickel Complex of Sodium Pectate as Catalyst for Proton-Exchange Membrane Fuel Cells

**Kirill V. Kholin** <sup>1,2</sup>, **Aigul F. Sabirova** <sup>1,2</sup>, **Danis M. Kadirov** <sup>2</sup>, **Ayrat R. Khamatgalimov** <sup>1</sup>,  
**Mikhail N. Khrizanforov** <sup>1,3</sup>, **Irek R. Nizameev** <sup>1,2,4</sup>, **Mikhail V. Morozov** <sup>4</sup>, **Radis R. Gainullin** <sup>1,2</sup>,  
**Timur P. Sultanov** <sup>1,2</sup>, **Salima T. Minzanova** <sup>1</sup>, **Eugene S. Nefed'ev** <sup>2</sup> and **Marsil K. Kadirov** <sup>1,2,\*</sup>

<sup>1</sup> Arbuzov Institute of Organic and Physical Chemistry, FRC Kazan Scientific Center, Russian Academy of Sciences, Kazan 420088, Russia; kholin06@mail.ru (K.V.K.); aigul84saf@mail.ru (A.F.S.); ayrat\_kh@iopc.ru (A.R.K.); khrizanforov@gmail.com (M.N.K.); inizameyev@iopc.ru (I.R.N.); radis.g@mail.ru (R.R.G.); sultanovtp05@mail.ru (T.P.S.); minzanova@iopc.ru (S.T.M.)

<sup>2</sup> Department of Physics, Kazan National Research Technological University, Kazan 420015, Russia; daniskadirov@gmail.com (D.M.K.); nefedev1947@gmail.com (E.S.N.)

<sup>3</sup> A.M. Butlerov Chemistry Institute, Kazan Federal University, Kremlevskaya Str. 18, Kazan 420008, Russia

<sup>4</sup> Department of Nanotechnology in Electronics, Kazan National Research Technical University named after A.N. Tupolev — KAI, Kazan 420111, Russia; misha617@mail.ru

\* Correspondence: kamaka59@gmail.com; Tel.: +7-(927)-417-45-59

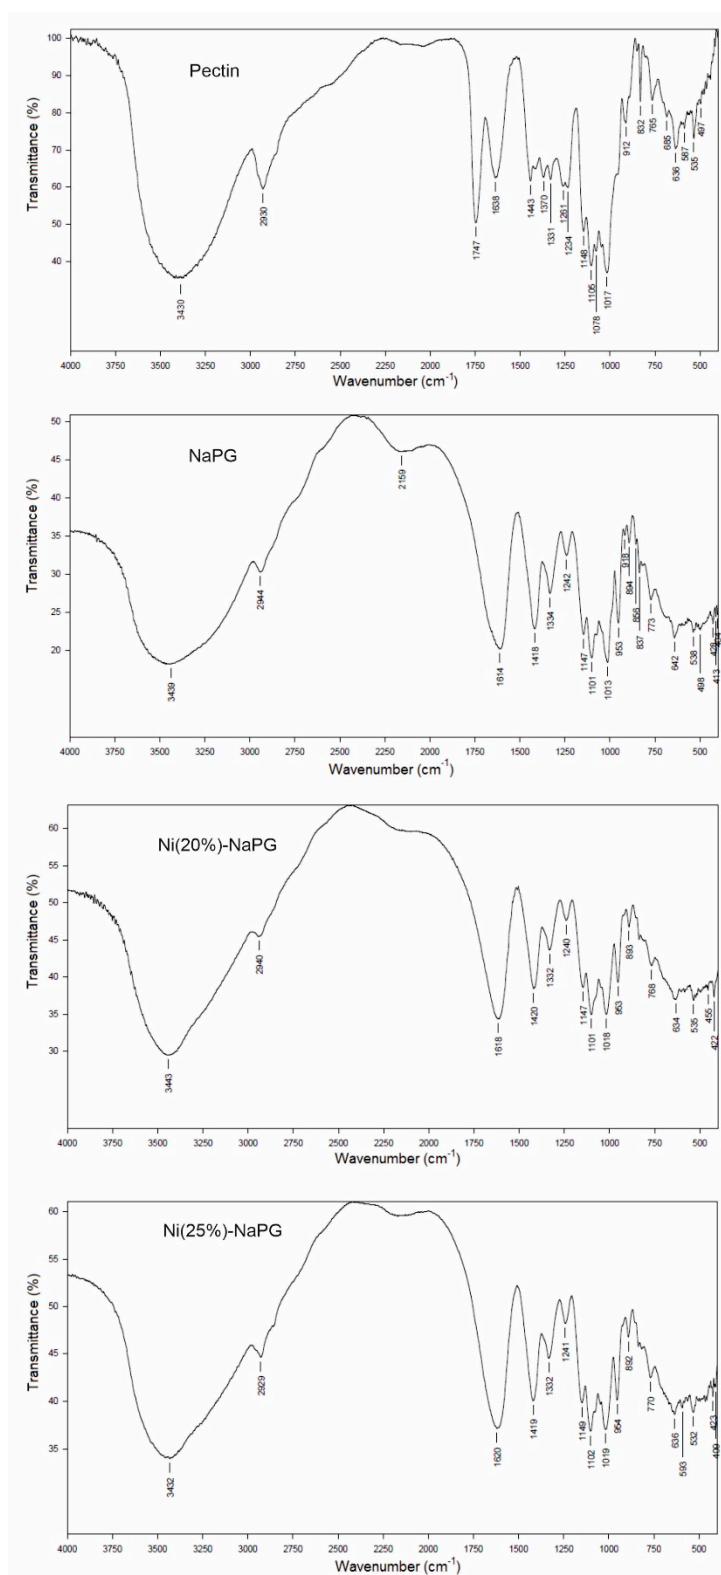

**Figure S1.** IR spectra of the pectin, sodium polygalacturonate (NaPG) and sodium polygalacturonate complexes [Ni(20%)-NaPG], [Ni(25%)-NaPG] with 20% and 25% substitution of sodium with nickel, consequently.

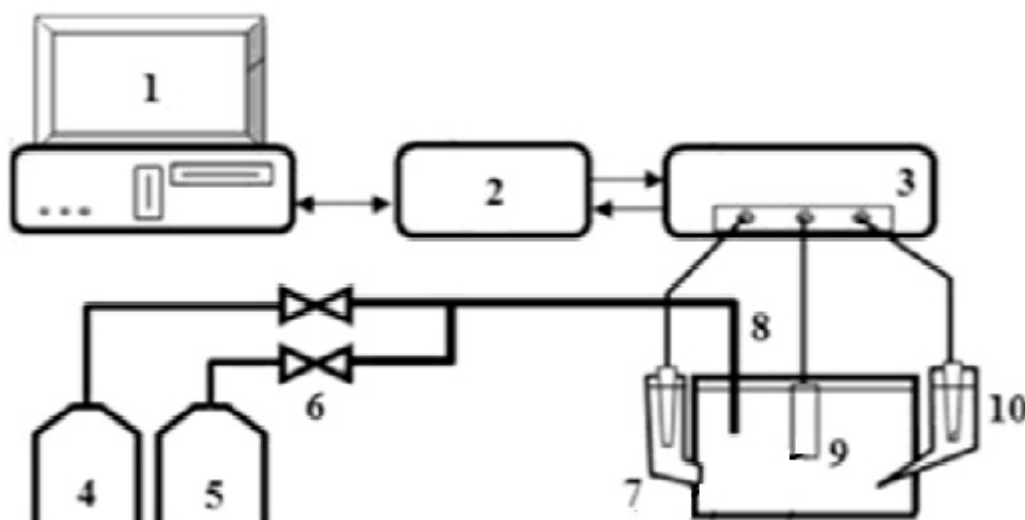

**Figure S2.** The scheme of electrochemical set-up. 1- computer, 2 – potentiostat Elins P-20x, 3 – rotating disc electrode – Basi RDE-2, 4 – vessel with inert gas (Ar), 5 – vessel with oxygen, 6 – valve of microadjusting, 7 – counter electrode, 8 – capillary for gas introducing, 9 – working electrode, 10 – reference electrode.

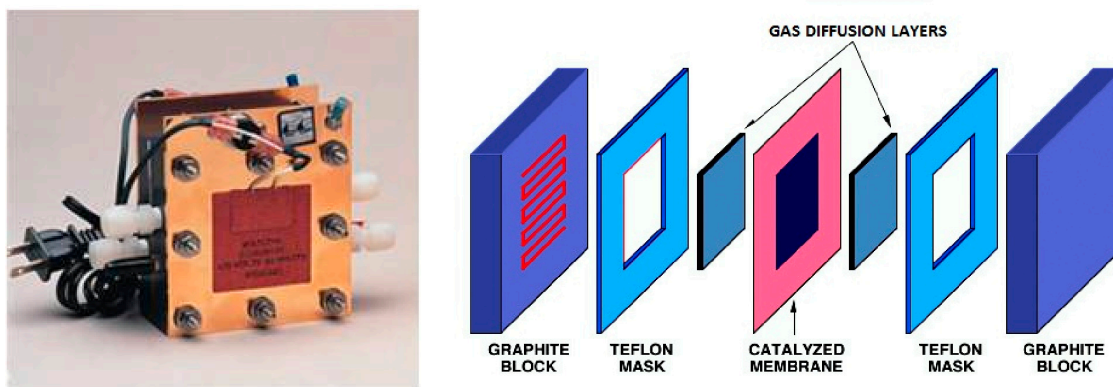

**Figure S3.** Scheme and appearance of the standard PEMFC used in the tests.
